# Supplementary material
Source: PubMed Central journal article supplement (PMC5814345)

Figure S1

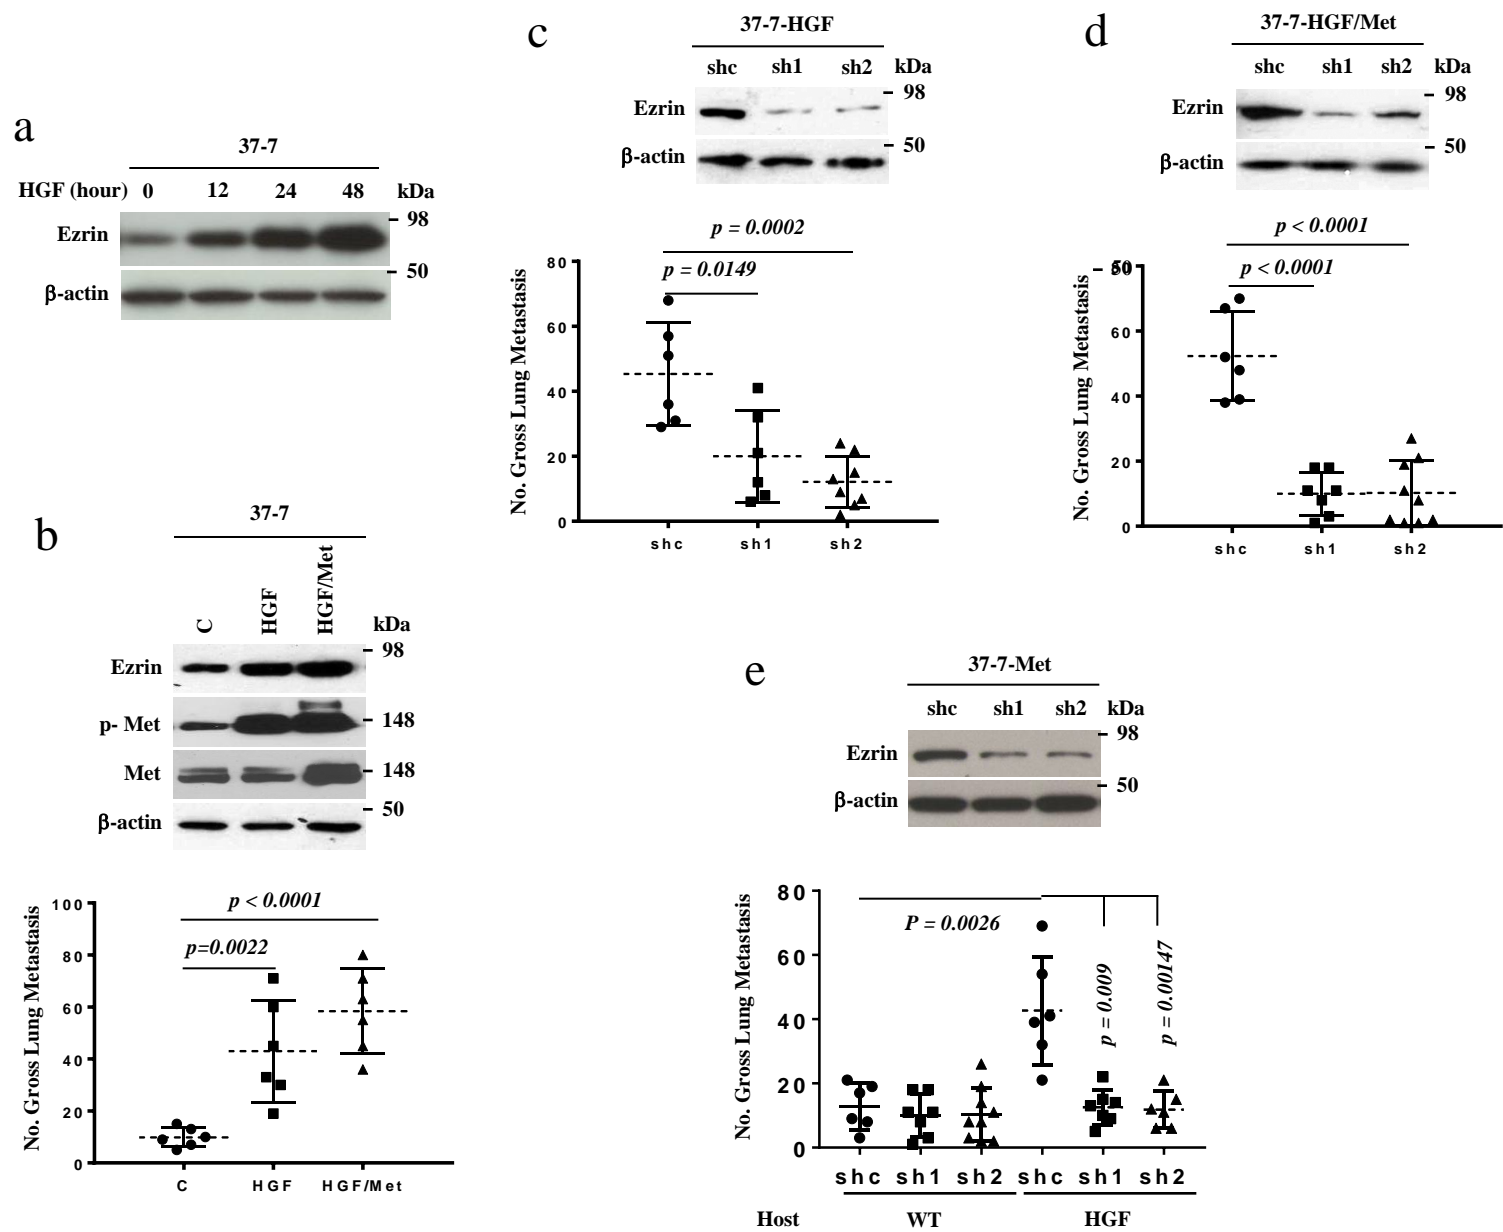

Figure S2

AliBaba predicts the transcription factor  
binding sites in Ezrin promoter

```
-960  
gctcgtatctcaaccctcacccaacttcaaccacctgaaactttcatccccaggtgggctttgaaccg  
          =====Sp1=====          =====Sp1====  
gctttgagaaccaagactttaattatacccacagattccaccagtgtacaggaaacattggactat  
  
tccgcggggcggggaggacttttagagttagtttttaggcagacttcagagaccactacctgtggagcc  
=====Sp1====  
          =====Sp1=====          =====Sp1====  
  
tttgctacaattagtct  
          -736
```

**Figure S3**

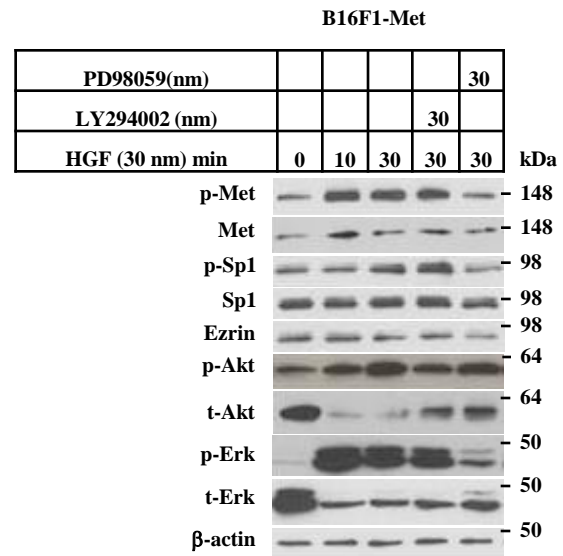

Supplement: NIHMS925137-supplement-Supp_Fig_1-3.pdf [file NIHMS925137-supplement-Supp_Fig_1-3.pdf]
